# Supplementary material for: Climate change, phenology, and butterfly host plant utilization
Source: PubMed Central journal article supplement (PMC4289000; doi:10.1007/s13280-014-0602-z), 2015-01-09
Supplement: 13280_2014_602_MOESM1_ESM.pdf [file 13280_2014_602_MOESM1_ESM.pdf]

## **Electronic Supplementary Material**

### **Climate change, phenology and butterfly host plant utilization.**

Jose A. Navarro-Cano, Bengt Karlsson, Diana Posledovich, Tenna Toftegaard, Christer Wiklund, Johan Ehrlén, Karl Gotthard

*This supplementary material has not been peer reviewed.*

**Table S1** Principal component analysis (PCA) factor loadings for the three host plant traits measured to assess latitudinal variation in *A. cardamines* host plant use

|                        | Rotated principal component |        |
|------------------------|-----------------------------|--------|
|                        | PC1                         | PC2    |
| Phenological state     | 0.238                       | 0.971  |
| Plant size             | 0.838                       | -0.117 |
| Inflorescence size     | 0.833                       | -0.160 |
| Variance explained (%) | 48.4                        | 32.7   |

**Table S2** Results of general linear models examining the effects of region, size and phenology, and their interactions on the probability of a plant individual being oviposited on (0 or 1) for seven host plant species. Effects significant at  $P \leq 0.05$  are in bold

| Species                        | Source of variation   | Oviposition (Analysis of deviance) |           |                     |                  |
|--------------------------------|-----------------------|------------------------------------|-----------|---------------------|------------------|
|                                |                       | df                                 | Resid. df | Chi-square deviance | P                |
| <i>Arabidopsis thaliana</i>    | Region                | 2                                  | 1305      | 4.268               | 0.118            |
|                                | Size                  | 1                                  | 1304      | 49.598              | <b>&lt;0.001</b> |
|                                | Phenology             | 1                                  | 1303      | 1.711               | 0.191            |
|                                | Region×Size           | 2                                  | 1301      | 8.859               | <b>0.012</b>     |
|                                | Region×Phenology      | 2                                  | 1299      | 0.096               | 0.953            |
|                                | Size×Phenology        | 1                                  | 1298      | 10.817              | <b>&lt;0.001</b> |
|                                | Region×Size×Phenology | 2                                  | 1296      | 5.460               | 0.065            |
| <i>Thlaspi caerulescens</i>    | Region                | 1                                  | 540       | 1.370               | 0.242            |
|                                | Size                  | 1                                  | 539       | 1.381               | 0.240            |
|                                | Phenology             | 1                                  | 538       | 12.687              | <b>&lt;0.001</b> |
|                                | Region×Size           | 1                                  | 537       | 0.009               | 0.923            |
|                                | Region×Phenology      | 1                                  | 536       | 9.189               | <b>0.002</b>     |
|                                | Size×Phenology        | 1                                  | 535       | 8.213               | <b>0.004</b>     |
|                                | Region×Size×Phenology | 1                                  | 534       | 4.155               | <b>0.042</b>     |
| <i>Capsella bursa-pastoris</i> | Region                | 2                                  | 878       | 41.97               | <b>&lt;0.001</b> |
|                                | Size                  | 1                                  | 877       | 41.50               | <b>&lt;0.001</b> |
|                                | Phenology             | 1                                  | 876       | 0.83                | 0.36             |
|                                | Region×Size           | 2                                  | 874       | 3.37                | 0.19             |
|                                | Region×Phenology      | 2                                  | 872       | 1.07                | 0.59             |
|                                | Size×Phenology        | 1                                  | 871       | 14.06               | <b>&lt;0.001</b> |
|                                | Region×Size×Phenology | 2                                  | 869       | 3.93                | 0.14             |
| <i>Cardamine pratensis</i>     | Region                | 2                                  | 828       | 55.55               | <b>&lt;0.001</b> |
|                                | Size                  | 1                                  | 827       | 25.26               | <b>&lt;0.001</b> |
|                                | Phenology             | 1                                  | 826       | 4.55                | <b>0.03</b>      |
|                                | Region×Size           | 2                                  | 824       | 2.62                | 0.27             |
|                                | Region×Phenology      | 2                                  | 822       | 7.82                | <b>0.02</b>      |
|                                | Size×Phenology        | 1                                  | 821       | 0.48                | 0.49             |
|                                | Region×Size×Phenology | 2                                  | 819       | 3.77                | 0.15             |
| <i>Cardamine paludosa</i>      | Region                | 2                                  | 1254      | 25.92               | <b>&lt;0.001</b> |
|                                | Size                  | 1                                  | 1253      | 162.15              | <b>&lt;0.001</b> |
|                                | Phenology             | 1                                  | 1252      | 4.70                | <b>0.03</b>      |
|                                | Region×Size           | 2                                  | 1250      | 11.58               | <b>0.003</b>     |
|                                | Region×Phenology      | 2                                  | 1248      | 0.62                | 0.73             |
|                                | Size×Phenology        | 1                                  | 1247      | 0.22                | 0.64             |
|                                | Region×Size×Phenology | 2                                  | 1245      | 5.00                | 0.08             |
| <i>Arabis hirsuta</i>          | Region                | 1                                  | 906       | 2.95                | 0.09             |
|                                | Size                  | 1                                  | 905       | 75.57               | <b>&lt;0.001</b> |
|                                | Phenology             | 1                                  | 904       | 1.99                | 0.16             |
|                                | Region×Size           | 1                                  | 904       | 1.15                | 0.28             |
|                                | Region×Phenology      | 1                                  | 903       | 2.83                | 0.09             |
|                                | Size×Phenology        | 1                                  | 902       | 0.25                | 0.62             |
|                                | Region×Size×Phenology | 1                                  | 901       | 7.47                | <b>0.010</b>     |

---

|                      |                       |   |     |        |                  |
|----------------------|-----------------------|---|-----|--------|------------------|
| <i>Arabis glabra</i> | Region                | 1 | 454 | 47.110 | <b>&lt;0.001</b> |
|                      | Size                  | 1 | 453 | 6.556  | <b>0.010</b>     |
|                      | Phenology             | 1 | 452 | 17.898 | <b>&lt;0.001</b> |
|                      | Region×Size           | 1 | 451 | 3.745  | <b>0.053</b>     |
|                      | Region×Phenology      | 1 | 450 | 1.758  | 0.185            |
|                      | Size×Phenology        | 1 | 449 | 9.650  | <b>0.002</b>     |
|                      | Region×Size×Phenology | 1 | 448 | 6.687  | <b>0.010</b>     |

---

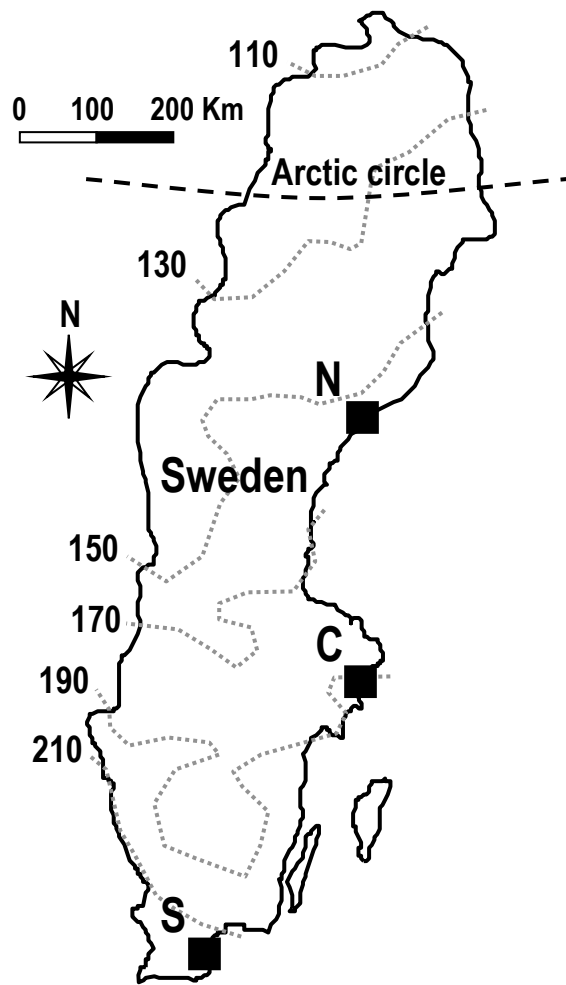

**Fig S1** Sampling regions (south, central and north) along a south-north climatic gradient in Sweden and isoclines for the length of the climatic growing season in days (redrawn from Sjörs 1999).

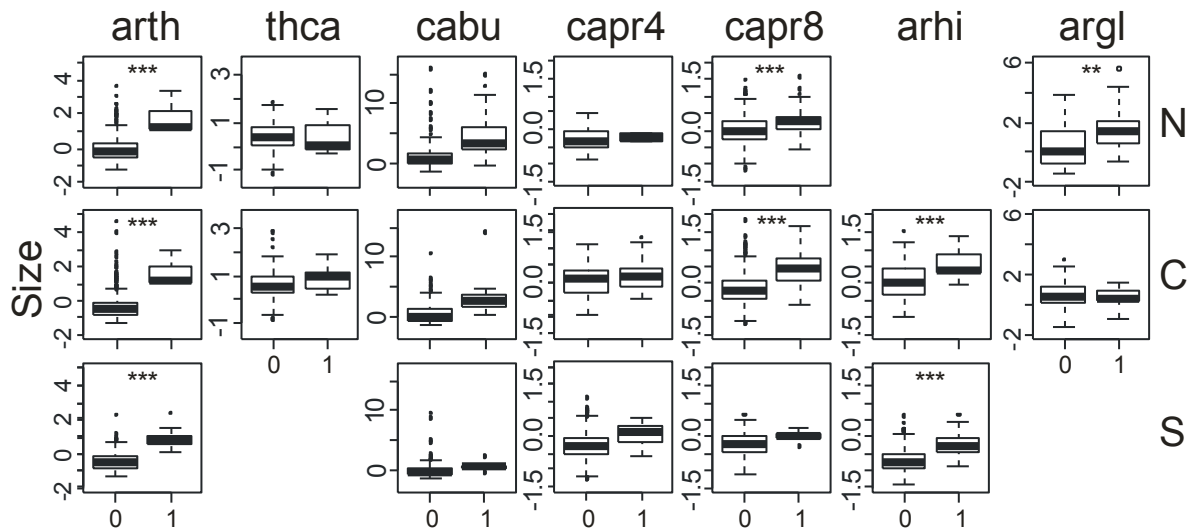

**Fig. S2** Box-plots showing the effects of the predictor variable Size (PC1) on the oviposition (binary response variable; 0 = egg absence, 1 = presence) in the south (S), central (C) and north region (N). Significant effects of separate logistic regression models for the species with a significant interaction region  $\times$  size or region  $\times$  size  $\times$  phenology are indicated by asterisks in the upper part of each box-plot ( $P \leq 0.05^*$ ,  $P \leq 0.01^{**}$ ,  $P \leq 0.001^{***}$ ). Note the among-species different scale. Box-plots showing the mean size (first axis from a PCA, see text) for plant individuals of seven different species and from three different regions that were either oviposited on by the butterfly *Anthocharis cardamines* (1) or that escaped attack (0). The seven host plant species were: arth = *Arabidopsis thaliana*), thca = *Thlaspi caerulescens*, cabu = *Capsella bursa-pastoris*, capr4 = *Cardamine pratensis*), capr8 = *Cardamine paludosa*, arhi = *Arabis hirsuta*, and argl = *Arabis glabra*. The three regions were: south (S), central (C) and north (N). Significant differences between groups are indicated by asterisks ( $P \leq 0.05^*$ ,  $P \leq 0.01^{**}$ ,  $P \leq 0.001^{***}$ ). Note that scales differ among species.
